# Supplementary material
Source: ML conference proceedings conference paper supplement (https://openaccess.thecvf.com/content/ICCV2021/html/Rony_Augmented_Lagrangian_Adversarial_ICCV_2021_paper.html)
Supplement: Supplementary file 1 [file Rony_Augmented_Lagrangian_Adversarial_ICCV_2021_supplemental.pdf]

## Appendix

### A. Differences with ADMM attack [36] and StrAttack [31]

There is a significant technical difference between our proposed attack and the two attacks based on ADMM approaches [36, 31] as the multipliers in the ADMM attacks are used for the problem-splitting constraints, but not for the attack constraints as in our ALM. For two terms, ADMM replaces a one-variable problem of the form  $\min_x f(x) + g(x)$  by a two-variable problem:

$$\min_{x,y} f(x) + g(y) \quad \text{s.t.} \quad x = y \quad (11)$$

a splitting that gives raise to variable-consistency constraints  $x = y$ . In fact, both ADMM attacks [31, 36] are based on a decomposition of the Carlini-Wagner penalty formulation (Equation 7 in [36] and Equation 4 in [31]):

$$D(x + \delta, x) + g_{\text{CW}}(\beta) \quad \text{s.t.} \quad \delta = \beta \quad (12)$$

where  $D$  is the distance and  $g_{\text{CW}}$  is the standard CW penalty for attack constraint  $f_y(\mathbf{x} + \delta) - \max_{k \neq y} f_k(\mathbf{x} + \delta) < 0$ ; see Equation 5 in [36] and Equation 3 in [31]. The Lagrange multipliers in these ADMM attacks are for the decomposition constraints  $\delta = \beta$ , but the attack constraints are still handled with the standard CW penalty. In our case, we address the attack constraints with augmented Lagrangian principles, and there is no ADMM splitting in our method. The ADMM attack in [36] has no public implementation, so we were not able to implement it in our experimental framework. The publicly available implementation of the StrAttack [31] contains several differences with the original paper regarding hyper-parameters and update rules for the auxiliary variables. Therefore, we contacted the authors of both papers (of which several are in common) regarding the lack of public implementation, and discrepancies between paper and code, but did not get any answer. Therefore, we did not include these attacks in our experiments. It should be noted that StrAttack’s [31] implementation is based on the C&W  $\ell_2$  attack, but adds a sparsity objective, which tends to increase the perturbation size in terms of  $\ell_2$  norm compared to the vanilla C&W  $\ell_2$  attack.

### B. CIEDE2000

The CIEDE2000 color difference formula is complex, so we advise the reader to look at the original work [27]. This formula is calculated using the CIELAB color space. However, most image datasets are provided in an RGB format. Therefore, to use the CIEDE2000 color difference formula, we must first convert the images from RGB to the CIELAB color space. We need to use a first conversion between RGB and XYZ color spaces. For this step, we need to know the

RGB working space and the reference white. However, we do not have that information available, as we do not know how the images were captured in the first place. As a consequence, we make the assumption of the sRGB working space with an Illuminant D65 white reference. With these assumptions, the formula to convert from RGB (with values in  $[0, 1]$ ) to XYZ is the following:

$$\begin{bmatrix} X \\ Y \\ Z \end{bmatrix} = \begin{bmatrix} 0.4124564 & 0.3575761 & 0.1804375 \\ 0.2126729 & 0.7151522 & 0.0721750 \\ 0.0193339 & 0.1191920 & 0.9503041 \end{bmatrix} \begin{bmatrix} R \\ G \\ B \end{bmatrix} \quad (13)$$

Once we have the colors represented in the XYZ color space, we need to convert to the CIELAB color space. The conversion is the following:

$$\begin{aligned} L^* &= 116f\left(\frac{Y}{Y_n}\right) - 16 \\ a^* &= 500\left(f\left(\frac{X}{X_n}\right) - f\left(\frac{Y}{Y_n}\right)\right) \\ b^* &= 200\left(f\left(\frac{Y}{Y_n}\right) - f\left(\frac{Z}{Z_n}\right)\right) \end{aligned} \quad (14)$$

where:

$$f(t) = \begin{cases} \sqrt[3]{t} & \text{if } t > \delta^3 \\ \frac{t}{3\delta^2} + \frac{4}{29} & \text{otherwise} \end{cases} \quad (15)$$

with  $\delta = \frac{6}{29}$ . Under the Illuminant D65 white reference, we have  $X_n = 95.0489$ ,  $Y_n = 100$  and  $Z_n = 108.8840$ .

### C. Modified DLR loss

The original DLR loss proposed in [13] is formulated as follows:

$$\text{DLR}(z, y) = -\frac{z_y - \max_{i \neq y} z_i}{z_{\pi_1} - z_{\pi_3}} \quad (16)$$

where  $z = f(\mathbf{x})$  and  $\pi$  is the ordering of the element of  $z$  in decreasing order. If a sample  $\mathbf{x}$  is correctly classified, we have  $\text{DLR}(z, y) \in [-1, 0]$  and  $\mathbf{x}$  is misclassified only if  $\text{DLR}(z, y) > 0$ . Croce *et al.* also propose a variant for untargeted attacks with a targeted objective. In some cases, performing a targeted attack against each class proved to be more successful at finding untargeted adversarial examples than simply performing an untargeted attack. The targeted variant is:

$$\text{tDLR}(z, y) = -\frac{z_y - z_t}{z_{\pi_1} - (z_{\pi_3} + z_{\pi_4})/2} \quad (17)$$

where  $t$  is the target class. For this variant, we can have no guarantee as to what  $\mathbf{x}$  is classified as, simply by looking at the value of tDLR.

For our optimization problem, we need to have a loss that is negative only when the misclassification or targeted classification is achieved. This way, we can formulate the misclassification or targeted classification constraint as  $g(x) < 0$ .

To this end, we modify DLR by taking the negative as follows:

$$\text{DLR}^+(z, y) = \frac{z_y - \max_{i \neq y} z_i}{z_{\pi_1} - z_{\pi_3}} \quad (4)$$

For targeted attack, we modify tDLR as follows:

$$\text{tDLR}^+(z, y) = \frac{\max_{i \neq t} z_i - z_t}{z_{\pi_1} - (z_{\pi_3} + z_{\pi_4})/2} \quad (18)$$

With these modifications, the misclassification and targeted classification constraints are respected only when  $\text{DLR}^+$  and  $\text{tDLR}^+$  are negative. Conversely, the constraints are violated when these losses are positive, hence the  $^+$  superscript.

## D. Penalty functions

The four penalty functions plotted in [Figure 1](#) are taken from [\[4\]](#) and defined as follows:

$$\text{PHR}(y, \rho, \mu) = \frac{1}{2\rho} (\max\{0, \mu + \rho y\}^2 - \mu^2) \quad (19)$$

$$P_1(y, \rho, \mu) = \begin{cases} \mu y + \frac{1}{2}\rho y^2 + \rho^2 y^3 & \text{if } y \geq 0 \\ \mu y + \frac{1}{2}\rho y^2 & \text{if } -\frac{\mu}{\rho} \leq y \leq 0 \\ -\frac{1}{2\rho}\mu^2 & \text{if } y \leq -\frac{\mu}{\rho} \end{cases} \quad (20)$$

$$P_2(y, \rho, \mu) = \begin{cases} \mu y + \mu\rho y^2 + \frac{1}{6}\rho^2 y^3 & \text{if } y \geq 0 \\ \frac{\mu y}{1-\rho y} & \text{if } y \leq 0 \end{cases} \quad (21)$$

$$P_3(y, \rho, \mu) = \begin{cases} \mu y + \mu\rho y^2 & \text{if } y \geq 0 \\ \frac{\mu y}{1-\rho y} & \text{if } y \leq 0 \end{cases} \quad (22)$$

## E. Choice of $\alpha$

For the experiments, we change the value of  $\alpha$  according to the number of iterations. In our attack,  $\alpha$  is a smoothing parameter. However, too much smoothing can degrade the performance of the attack for lower numbers of iterations. Therefore, we recommend values between 0.5 and 0.9 for numbers of iterations between 100 and 1 000, and to keep  $\alpha = 0.9$  for more than 1 000 iterations. Since our attack aims to find minimal adversarial perturbations, lower numbers of iterations are not recommended.

## F. Hyper-parameter $\epsilon$ values

[Table 3](#) reports the different  $\epsilon$  used for each distance function in our experiments.

## G. Additional results with SSIM

We also tested our ALMA attack with the SSIM [\[29\]](#) for which, to the best of our knowledge, no gradient-based attack currently exists. The only related work on adversarial attacks

| Distance  | $\epsilon$         |
|-----------|--------------------|
| $\ell_1$  | 0.5                |
| $\ell_2$  | 0.1                |
| SSIM      | $3 \times 10^{-5}$ |
| CIEDE2000 | 0.05               |
| LPIPS     | $1 \times 10^{-3}$ |

Table 3: Initial values of  $\epsilon$  for each distance.

and SSIM is a black-box method [\[16\]](#). SSIM is a similarity function, so identical images have a SSIM of 1. Therefore, we minimize the quantity  $1 - \text{SSIM}$  and report this instead of the SSIM. The SSIM metric is defined between two gray-level images. Several modifications exist for color images, however, we simply considered the average SSIM over the color channels. [Tables 10](#) and [15](#) report the results for all models on CIFAR10 and ImageNet respectively.

## H. Detailed experimental results

[Tables 4, 5, 6, 7, 10, 8, 9, 11, 12, 15, 13](#) and [14](#) report the detailed results for each dataset, model and attack. Results from [Tables 1](#) and [2](#) are calculated from these tables using the geometric mean over the models. For the CIFAR10 and ImageNet models, RN stands for ResNet and WRN for Wide ResNet. For ImageNet, the targeted variant of FAB is used in the experiments denoted by a T superscript (see [Section 4](#) for details).

## I. Robust Accuracy curves

[Figures 6, 7, 8, 9, 10, 12, 13](#) and [14](#) present the robust accuracy curves for each dataset and model against the attacks considered for each distance. The dotted line represent the reduced budget versions of the attack, as reported in the corresponding tables.

| Model              | Attack                  | ASR (%) | Median $\ell_1$ | forwards / backwards |
|--------------------|-------------------------|---------|-----------------|----------------------|
| SmallCNN           | EAD $9 \times 100$ [9]  | 100     | 8.41            | 870 / 439            |
|                    | EAD $9 \times 1000$ [9] | 100     | 7.90            | 3 810 / 1 909        |
|                    | FAB $\ell_1$ 100 [12]   | 100     | 6.31            | 201 / 1 000          |
|                    | FAB $\ell_1$ 1000 [12]  | 100     | 6.20            | 2 001 / 10 000       |
|                    | FMN $\ell_1$ 100 [25]   | 95.02   | 6.50            | 100 / 100            |
|                    | FMN $\ell_1$ 1000 [25]  | 95.19   | 6.39            | 1 000 / 1 000        |
|                    | ALMA $\ell_1$ 100       | 100     | 6.77            | 100 / 100            |
|                    | ALMA $\ell_1$ 1000      | 100     | 6.23            | 1 000 / 1 000        |
| SmallCNN<br>DDN    | EAD $9 \times 100$ [9]  | 100     | 17.41           | 990 / 499            |
|                    | EAD $9 \times 1000$ [9] | 100     | 16.35           | 5 010 / 2 509        |
|                    | FAB $\ell_1$ 100 [12]   | 100     | 16.53           | 201 / 1 000          |
|                    | FAB $\ell_1$ 1000 [12]  | 100     | 15.42           | 2 001 / 10 000       |
|                    | FMN $\ell_1$ 100 [25]   | 99.97   | 16.09           | 100 / 100            |
|                    | FMN $\ell_1$ 1000 [25]  | 99.97   | 15.67           | 1 000 / 1 000        |
|                    | ALMA $\ell_1$ 100       | 100     | 14.73           | 100 / 100            |
|                    | ALMA $\ell_1$ 1000      | 100     | 14.02           | 1 000 / 1 000        |
| SmallCNN<br>TRADES | EAD $9 \times 100$ [9]  | 100     | 14.80           | 967 / 486            |
|                    | EAD $9 \times 1000$ [9] | 100     | 12.15           | 6 409 / 3 208        |
|                    | FAB $\ell_1$ 100 [12]   | 99.22   | 36.60           | 201 / 1 000          |
|                    | FAB $\ell_1$ 1000 [12]  | 99.35   | 32.37           | 2 001 / 10 000       |
|                    | FMN $\ell_1$ 100 [25]   | 50.30   | 42.02           | 100 / 100            |
|                    | FMN $\ell_1$ 1000 [25]  | 98.30   | 8.28            | 1 000 / 1 000        |
|                    | ALMA $\ell_1$ 100       | 100     | 6.16            | 100 / 100            |
| ALMA $\ell_1$ 1000 | 100                     | 5.32    | 1 000 / 1 000   |                      |
| CROWN<br>IBP       | EAD $9 \times 100$ [9]  | 89.17   | 106.95          | 509 / 258            |
|                    | EAD $9 \times 1000$ [9] | 91.32   | 86.45           | 5 210 / 2 609        |
|                    | FAB $\ell_1$ 100 [12]   | 99.99   | 147.79          | 201 / 1 000          |
|                    | FAB $\ell_1$ 1000 [12]  | 99.99   | 110.96          | 2 001 / 10 000       |
|                    | FMN $\ell_1$ 100 [25]   | 49.89   | –               | 100 / 100            |
|                    | FMN $\ell_1$ 1000 [25]  | 88.36   | 3.50            | 1 000 / 1 000        |
| ALMA $\ell_1$ 100  | 99.59                   | 27.94   | 100 / 100       |                      |
| ALMA $\ell_1$ 1000 | 100                     | 5.65    | 1 000 / 1 000   |                      |

Table 4: Performance of the  $\ell_1$  attacks on the MNIST dataset for each model.

| Model              | Attack                                | ASR (%) | Median $\ell_2$ | forwards / backwards |
|--------------------|---------------------------------------|---------|-----------------|----------------------|
| SmallCNN           | C&W $\ell_2$ $9 \times 1000$ [7]      | 99.98   | 1.35            | 9 000 / 9 000        |
|                    | C&W $\ell_2$ $9 \times 10 000$ [7]    | 99.77   | 1.35            | 90 000 / 90 000      |
|                    | DDN 100 [26]                          | 100     | 1.39            | 100 / 100            |
|                    | DDN 1000 [26]                         | 100     | 1.37            | 1 000 / 1 000        |
|                    | FAB $\ell_2$ 100 [12]                 | 100     | 1.37            | 201 / 1 000          |
|                    | FAB $\ell_2$ 1000 [12]                | 100     | 1.36            | 2 001 / 10 000       |
|                    | FMN $\ell_2$ 100 [25]                 | 82.04   | 1.53            | 100 / 100            |
|                    | FMN $\ell_2$ 1000 [25]                | 96.61   | 1.39            | 1 000 / 1 000        |
|                    | APGD $^{\dagger}_{DLR}$ $\ell_2$ [13] | 100     | 1.31            | 13 082 / 13 062      |
|                    | ALMA $\ell_2$ 100                     | 100     | 1.38            | 100 / 100            |
| ALMA $\ell_2$ 1000 | 100                                   | 1.32    | 1 000 / 1 000   |                      |
| SmallCNN<br>DDN    | C&W $\ell_2$ $9 \times 1000$ [7]      | 99.96   | 2.76            | 9 000 / 9 000        |
|                    | C&W $\ell_2$ $9 \times 10 000$ [7]    | 99.59   | 2.69            | 90 000 / 90 000      |
|                    | DDN 100 [26]                          | 100     | 2.74            | 100 / 100            |
|                    | DDN 1000 [26]                         | 100     | 2.66            | 1 000 / 1 000        |
|                    | FAB $\ell_2$ 100 [12]                 | 100     | 2.74            | 201 / 1 000          |
|                    | FAB $\ell_2$ 1000 [12]                | 100     | 2.71            | 2 001 / 10 000       |
|                    | FMN $\ell_2$ 100 [25]                 | 99.95   | 2.67            | 100 / 100            |
|                    | FMN $\ell_2$ 1000 [25]                | 100     | 2.67            | 1 000 / 1 000        |
|                    | APGD $^{\dagger}_{DLR}$ $\ell_2$ [13] | 100     | 2.58            | 13 410 / 13 390      |
|                    | ALMA $\ell_2$ 100                     | 100     | 2.68            | 100 / 100            |
| ALMA $\ell_2$ 1000 | 100                                   | 2.59    | 1 000 / 1 000   |                      |
| SmallCNN<br>TRADES | C&W $\ell_2$ $9 \times 1000$ [7]      | 99.99   | 3.32            | 9 000 / 9 000        |
|                    | C&W $\ell_2$ $9 \times 10 000$ [7]    | 99.97   | 2.28            | 90 000 / 90 000      |
|                    | DDN 100 [26]                          | 99.69   | 2.17            | 100 / 100            |
|                    | DDN 1000 [26]                         | 100     | 1.91            | 1 000 / 1 000        |
|                    | FAB $\ell_2$ 100 [12]                 | 99.88   | 1.77            | 201 / 1 000          |
|                    | FAB $\ell_2$ 1000 [12]                | 99.90   | 1.74            | 2 001 / 10 000       |
|                    | FMN $\ell_2$ 100 [25]                 | 86.41   | 2.24            | 100 / 100            |
|                    | FMN $\ell_2$ 1000 [25]                | 99.83   | 1.99            | 1 000 / 1 000        |
|                    | APGD $^{\dagger}_{DLR}$ $\ell_2$ [13] | 100     | 3.36            | 13 919 / 13 899      |
|                    | ALMA $\ell_2$ 100                     | 100     | 1.74            | 100 / 100            |
| ALMA $\ell_2$ 1000 | 100                                   | 1.55    | 1 000 / 1 000   |                      |
| CROWN<br>IBP       | C&W $\ell_2$ $9 \times 1000$ [7]      | 2.61    | –               | 9 000 / 9 000        |
|                    | C&W $\ell_2$ $9 \times 10 000$ [7]    | 2.63    | –               | 90 000 / 90 000      |
|                    | DDN 100 [26]                          | 94.34   | 1.46            | 100 / 100            |
|                    | DDN 1000 [26]                         | 99.27   | 0.97            | 1 000 / 1 000        |
|                    | FAB $\ell_2$ 100 [12]                 | 99.98   | 5.19            | 201 / 1 000          |
|                    | FAB $\ell_2$ 1000 [12]                | 99.98   | 3.34            | 2 001 / 10 000       |
|                    | FMN $\ell_2$ 100 [25]                 | 67.80   | 2.14            | 100 / 100            |
|                    | FMN $\ell_2$ 1000 [25]                | 89.08   | 1.34            | 1 000 / 1 000        |
|                    | APGD $^{\dagger}_{DLR}$ $\ell_2$ [13] | 99.94   | 3.57            | 9 286 / 9 273        |
|                    | ALMA $\ell_2$ 100                     | 98.90   | 4.96            | 100 / 100            |
| ALMA $\ell_2$ 1000 | 100                                   | 1.26    | 1 000 / 1 000   |                      |

Table 5: Performance of the  $\ell_2$  attacks on the MNIST dataset for each model.

| Model                                       | Attack                  | ASR (%) | Median $\ell_1$ | forwards / backwards |
|---------------------------------------------|-------------------------|---------|-----------------|----------------------|
| WRN<br>28-10                                | EAD $9 \times 100$ [9]  | 100     | 1.79            | 530 / 269            |
|                                             | EAD $9 \times 1000$ [9] | 100     | 1.62            | 4 910 / 2 459        |
|                                             | FAB $\ell_1$ 100 [12]   | 92.3    | 1.27            | 200 / 1 000          |
|                                             | FAB $\ell_1$ 1000 [12]  | 98.8    | 1.07            | 2 000 / 10 000       |
|                                             | FMN $\ell_1$ 100 [25]   | 99.7    | 1.01            | 100 / 100            |
|                                             | FMN $\ell_1$ 1000 [25]  | 99.5    | 0.98            | 1 000 / 1 000        |
|                                             | ALMA $\ell_1$ 100       | 100     | 1.26            | 100 / 100            |
|                                             | ALMA $\ell_1$ 1000      | 100     | 1.02            | 1 000 / 1 000        |
| WRN<br>28-10<br>Carmon<br><i>et al.</i> [8] | EAD $9 \times 100$ [9]  | 100     | 6.62            | 600 / 304            |
|                                             | EAD $9 \times 1000$ [9] | 100     | 6.07            | 3 760 / 1 884        |
|                                             | FAB $\ell_1$ 100 [12]   | 97.8    | 5.57            | 200 / 1 000          |
|                                             | FAB $\ell_1$ 1000 [12]  | 98.2    | 5.07            | 2 000 / 10 000       |
|                                             | FMN $\ell_1$ 100 [25]   | 100     | 4.70            | 100 / 100            |
|                                             | FMN $\ell_1$ 1000 [25]  | 100     | 4.64            | 1 000 / 1 000        |
| RN-50<br>Augustin<br><i>et al.</i> [1]      | ALMA $\ell_1$ 100       | 100     | 5.20            | 100 / 100            |
|                                             | ALMA $\ell_1$ 1000      | 100     | 4.75            | 1 000 / 1 000        |
|                                             | EAD $9 \times 100$ [9]  | 100     | 19.18           | 590 / 299            |
|                                             | EAD $9 \times 1000$ [9] | 100     | 16.39           | 4 260 / 2 134        |
|                                             | FAB $\ell_1$ 100 [12]   | 99.8    | 10.95           | 200 / 1 000          |
|                                             | FAB $\ell_1$ 1000 [12]  | 99.8    | 10.09           | 2 000 / 10 000       |
| WRN<br>28-10<br>Carmon<br><i>et al.</i> [8] | FMN $\ell_1$ 100 [25]   | 100     | 10.21           | 100 / 100            |
|                                             | FMN $\ell_1$ 1000 [25]  | 100     | 9.79            | 1 000 / 1 000        |
|                                             | ALMA $\ell_1$ 100       | 100     | 12.15           | 100 / 100            |
|                                             | ALMA $\ell_1$ 1000      | 100     | 10.35           | 1 000 / 1 000        |

Table 6: Performance of the  $\ell_1$  attacks on the CIFAR10 dataset for each model.

| Model                                       | Attack                                         | ASR (%) | Median $\ell_2$ | forwards / backwards |
|---------------------------------------------|------------------------------------------------|---------|-----------------|----------------------|
| WRN<br>28-10                                | C&W $\ell_2$ $9 \times 1000$ [7]               | 100     | 0.10            | 9 000 / 9 000        |
|                                             | C&W $\ell_2$ $9 \times 10 000$ [7]             | 100     | 0.10            | 90 000 / 90 000      |
|                                             | DDN 100 [26]                                   | 100     | 0.11            | 100 / 100            |
|                                             | DDN 1000 [26]                                  | 100     | 0.11            | 1 000 / 1 000        |
|                                             | FAB $\ell_2$ 100 [12]                          | 100     | 0.09            | 201 / 1 000          |
|                                             | FAB $\ell_2$ 1000 [12]                         | 100     | 0.09            | 2 001 / 10 000       |
|                                             | FMN $\ell_2$ 100 [25]                          | 99.7    | 0.12            | 100 / 100            |
|                                             | FMN $\ell_2$ 1000 [25]                         | 99.5    | 0.09            | 1 000 / 1 000        |
|                                             | APGD <sub>DLR</sub> <sup>T</sup> $\ell_2$ [13] | 100     | 0.09            | 4 336 / 4 312        |
|                                             | ALMA $\ell_2$ 100                              | 100     | 0.09            | 100 / 100            |
| ALMA $\ell_2$ 1000                          | 100                                            | 0.09    | 1 000 / 1 000   |                      |
| WRN<br>28-10<br>Carmon<br><i>et al.</i> [8] | C&W $\ell_2$ $9 \times 1000$ [7]               | 100     | 0.70            | 7 502 / 7 500        |
|                                             | C&W $\ell_2$ $9 \times 10 000$ [7]             | 100     | 0.70            | 71 602 / 71 600      |
|                                             | DDN 100 [26]                                   | 100     | 0.72            | 100 / 100            |
|                                             | DDN 1000 [26]                                  | 100     | 0.71            | 1 000 / 1 000        |
|                                             | FAB $\ell_2$ 100 [12]                          | 100     | 0.71            | 201 / 1 000          |
|                                             | FAB $\ell_2$ 1000 [12]                         | 100     | 0.71            | 2 001 / 10 000       |
|                                             | FMN $\ell_2$ 100 [25]                          | 100     | 0.69            | 100 / 100            |
|                                             | FMN $\ell_2$ 1000 [25]                         | 100     | 0.70            | 1 000 / 1 000        |
|                                             | APGD <sub>DLR</sub> <sup>T</sup> $\ell_2$ [13] | 100     | 0.68            | 5 683 / 5 659        |
|                                             | ALMA $\ell_2$ 100                              | 100     | 0.70            | 100 / 100            |
| ALMA $\ell_2$ 1000                          | 100                                            | 0.67    | 1 000 / 1 000   |                      |
| RN-50<br>Augustin<br><i>et al.</i> [1]      | C&W $\ell_2$ $9 \times 1000$ [7]               | 100     | 0.96            | 7 515 / 7 513        |
|                                             | C&W $\ell_2$ $9 \times 10 000$ [7]             | 100     | 0.95            | 73 869 / 73 867      |
|                                             | DDN 100 [26]                                   | 100     | 0.97            | 100 / 100            |
|                                             | DDN 1000 [26]                                  | 100     | 0.96            | 1 000 / 1 000        |
|                                             | FAB $\ell_2$ 100 [12]                          | 100     | 1.01            | 201 / 1 000          |
|                                             | FAB $\ell_2$ 1000 [12]                         | 100     | 1.00            | 2 001 / 10 000       |
|                                             | FMN $\ell_2$ 100 [25]                          | 100     | 0.95            | 100 / 100            |
|                                             | FMN $\ell_2$ 1000 [25]                         | 100     | 0.96            | 1 000 / 1 000        |
|                                             | APGD <sub>DLR</sub> <sup>T</sup> $\ell_2$ [13] | 100     | 0.91            | 6 198 / 6 174        |
|                                             | ALMA $\ell_2$ 100                              | 100     | 0.98            | 100 / 100            |
| ALMA $\ell_2$ 1000                          | 100                                            | 0.92    | 1 000 / 1 000   |                      |

Table 7: Performance of the  $\ell_2$  attacks on the CIFAR10 dataset for each model.

| Model                                       | Attack                        | ASR (%) | Median CIEDE2000 | forwards / backwards |
|---------------------------------------------|-------------------------------|---------|------------------|----------------------|
| WRN<br>28-10                                | C&W CIEDE2000 $9 \times 1000$ | 100     | 0.23             | 7 741 / 7 740        |
|                                             | Perc-AL 100 [37]              | 100     | 0.86             | 201 / 100            |
|                                             | Perc-AL 1000 [37]             | 100     | 0.72             | 2 001 / 1 000        |
|                                             | ALMA CIEDE2000 100            | 100     | 0.18             | 100 / 100            |
| ALMA CIEDE2000 1000                         | 100                           | 0.14    | 1 000 / 1 000    |                      |
| WRN<br>28-10<br>Carmon<br><i>et al.</i> [8] | C&W CIEDE2000 $9 \times 1000$ | 100     | 2.12             | 6 243 / 6 240        |
|                                             | Perc-AL 100 [37]              | 100     | 5.69             | 201 / 100            |
|                                             | Perc-AL 1000 [37]             | 100     | 5.82             | 2 001 / 1 000        |
|                                             | ALMA CIEDE2000 100            | 100     | 3.65             | 100 / 100            |
|                                             | ALMA CIEDE2000 1000           | 100     | 2.08             | 1 000 / 1 000        |
| RN-50<br>Augustin<br><i>et al.</i> [1]      | C&W CIEDE2000 $9 \times 1000$ | 100     | 1.63             | 6 303 / 6 300        |
|                                             | Perc-AL 100 [37]              | 100     | 4.85             | 201 / 100            |
|                                             | Perc-AL 1000 [37]             | 100     | 4.83             | 2 001 / 1 000        |
|                                             | ALMA CIEDE2000 100            | 99.8    | 1.94             | 100 / 100            |
| ALMA CIEDE2000 1000                         | 99.8                          | 1.58    | 1 000 / 1 000    |                      |

Table 8: Performance of the CIEDE2000 attacks on the CIFAR10 dataset for each model.

| Model                                 | Attack                    | ASR (%) | Median LPIPS $\times 10^{-2}$ | forwards / backwards |
|---------------------------------------|---------------------------|---------|-------------------------------|----------------------|
| WRN 28-10                             | C&W LPIPS $9 \times 1000$ | 100     | 0.32                          | 4565 / 4560          |
|                                       | LPA <sup>‡</sup> [21]     | 100     | 4.81                          | 1129 / 1119          |
|                                       | ALMA LPIPS 100            | 100     | 0.29                          | 100 / 100            |
|                                       | ALMA LPIPS 1000           | 100     | 0.12                          | 1000 / 1000          |
| WRN 28-10<br>Carmon <i>et al.</i> [8] | C&W LPIPS $9 \times 1000$ | 100     | 0.50                          | 7981 / 7980          |
|                                       | LPA <sup>‡</sup> [21]     | 100     | 5.06                          | 1092 / 1082          |
|                                       | ALMA LPIPS 100            | 100     | 6.76                          | 100 / 100            |
|                                       | ALMA LPIPS 1000           | 100     | 1.01                          | 1000 / 1000          |
| RN-50<br>Augustin <i>et al.</i> [1]   | C&W LPIPS $9 \times 1000$ | 100     | 0.64                          | 8101 / 8100          |
|                                       | LPA <sup>‡</sup> [21]     | 100     | 6.42                          | 1133 / 1123          |
|                                       | ALMA LPIPS 100            | 99.9    | 7.66                          | 100 / 100            |
|                                       | ALMA LPIPS 1000           | 100     | 1.82                          | 1000 / 1000          |

Table 9: Performance of the LPIPS variant of ALMA on the CIFAR10 dataset for each model. <sup>‡</sup>A binary search is performed on each sample to get a minimal perturbation attack (Equation 2).

| Model                                         | Attack         | ASR (%) | Median 1-SSIM $\times 10^{-4}$ | forwards / backwards |
|-----------------------------------------------|----------------|---------|--------------------------------|----------------------|
| WRN 28-10                                     | ALMA SSIM 100  | 100     | 0.4                            | 100 / 100            |
|                                               | ALMA SSIM 1000 | 100     | 0.1                            | 1000 / 1000          |
| Wide ResNet 28-10<br>Carmon <i>et al.</i> [8] | ALMA SSIM 100  | 100     | 7.5                            | 100 / 100            |
|                                               | ALMA SSIM 1000 | 100     | 2.8                            | 1000 / 1000          |
| ResNet-50<br>Augustin <i>et al.</i> [1]       | ALMA SSIM 100  | 100     | 4.1                            | 100 / 100            |
|                                               | ALMA SSIM 1000 | 100     | 2.0                            | 1000 / 1000          |

Table 10: Performance of the SSIM variant of ALMA on the CIFAR10 dataset for each model.

| Model                      | Attack                              | ASR (%) | Median $\ell_1$ | forwards / backwards |
|----------------------------|-------------------------------------|---------|-----------------|----------------------|
| RN-50                      | EAD $9 \times 100$ [9]              | 100     | 6.70            | 437 / 222            |
|                            | EAD $9 \times 1000$ [9]             | 100     | 6.08            | 4510 / 2259          |
|                            | FAB <sup>T</sup> $\ell_1$ 100 [12]  | 74.4    | 9.01            | 1810 / 900           |
|                            | FAB <sup>T</sup> $\ell_1$ 1000 [12] | 81.0    | 4.82            | 18010 / 9000         |
|                            | FMN $\ell_1$ 100 [25]               | 95.6    | 3.72            | 100 / 100            |
|                            | FMN $\ell_1$ 1000 [25]              | 94.5    | 3.43            | 1000 / 1000          |
|                            | ALMA $\ell_1$ 100                   | 100     | 8.47            | 100 / 100            |
|                            | ALMA $\ell_1$ 1000                  | 100     | 4.25            | 1000 / 1000          |
| RN-50<br>$\ell_2$ -AT      | EAD $9 \times 100$ [9]              | 100     | 62.21           | 458 / 233            |
|                            | EAD $9 \times 1000$ [9]             | 100     | 55.16           | 3450 / 1729          |
|                            | FAB <sup>T</sup> $\ell_1$ 100 [12]  | 98.5    | 31.33           | 1810 / 900           |
|                            | FAB <sup>T</sup> $\ell_1$ 1000 [12] | 93.2    | 33.58           | 18010 / 9000         |
|                            | FMN $\ell_1$ 100 [25]               | 100     | 36.68           | 100 / 100            |
|                            | FMN $\ell_1$ 1000 [25]              | 100     | 30.52           | 1000 / 1000          |
|                            | ALMA $\ell_1$ 100                   | 100     | 61.37           | 100 / 100            |
|                            | ALMA $\ell_1$ 1000                  | 100     | 40.41           | 1000 / 1000          |
| RN-50<br>$\ell_\infty$ -AT | EAD $9 \times 100$ [9]              | 100     | 6.40            | 582 / 295            |
|                            | EAD $9 \times 1000$ [9]             | 100     | 6.29            | 3410 / 1709          |
|                            | FAB <sup>T</sup> $\ell_1$ 100 [12]  | 95.6    | 4.36            | 1810 / 900           |
|                            | FAB <sup>T</sup> $\ell_1$ 1000 [12] | 93.6    | 4.33            | 18010 / 9000         |
|                            | FMN $\ell_1$ 100 [25]               | 87.8    | 4.16            | 100 / 100            |
|                            | FMN $\ell_1$ 1000 [25]              | 87.7    | 4.16            | 1000 / 1000          |
|                            | ALMA $\ell_1$ 100                   | 100     | 14.90           | 100 / 100            |
|                            | ALMA $\ell_1$ 1000                  | 100     | 10.33           | 1000 / 1000          |

Table 11: Performance of the  $\ell_1$  attacks on the ImageNet dataset for each model.

| Model                                          | Attack                                         | ASR (%)                          | Median $\ell_2$ | forwards / backwards |
|------------------------------------------------|------------------------------------------------|----------------------------------|-----------------|----------------------|
| RN-50                                          | C&W $\ell_2$ $9 \times 1000$ [7]               | 100                              | 0.21            | 8775 / 8775          |
|                                                | C&W $\ell_2$ $9 \times 10000$ [7]              | 100                              | 0.21            | 82668 / 82667        |
|                                                | DDN 100 [26]                                   | 99.8                             | 0.18            | 100 / 100            |
|                                                | DDN 1000 [26]                                  | 99.9                             | 0.17            | 1000 / 1000          |
|                                                | FAB <sup>T</sup> $\ell_2$ 100 [12]             | 99.3                             | 0.10            | 1810 / 900           |
|                                                | FAB <sup>T</sup> $\ell_2$ 1000 [12]            | 98.0                             | 0.10            | 18010 / 9000         |
|                                                | FMN $\ell_2$ 100 [25]                          | 98.9                             | 0.12            | 100 / 100            |
|                                                | FMN $\ell_2$ 1000 [25]                         | 99.3                             | 0.10            | 1000 / 1000          |
|                                                | APGD <sup>T</sup> <sub>DLR</sub> $\ell_2$ [13] | 100                              | 0.09            | 4866 / 4838          |
|                                                | ALMA $\ell_2$ 100                              | 100                              | 0.10            | 100 / 100            |
|                                                | ALMA $\ell_2$ 1000                             | 100                              | 0.10            | 1000 / 1000          |
|                                                | RN-50<br>$\ell_2$ -AT                          | C&W $\ell_2$ $9 \times 1000$ [7] | 99.9            | 1.17                 |
| C&W $\ell_2$ $9 \times 10000$ [7]              |                                                | 99.9                             | 1.17            | 57004 / 52000        |
| DDN 100 [26]                                   |                                                | 99.5                             | 1.09            | 100 / 100            |
| DDN 1000 [26]                                  |                                                | 99.7                             | 1.10            | 1000 / 1000          |
| FAB <sup>T</sup> $\ell_2$ 100 [12]             |                                                | 100                              | 0.81            | 1810 / 900           |
| FAB <sup>T</sup> $\ell_2$ 1000 [12]            |                                                | 99.3                             | 0.81            | 18010 / 9000         |
| FMN $\ell_2$ 100 [25]                          |                                                | 99.6                             | 0.84            | 100 / 100            |
| FMN $\ell_2$ 1000 [25]                         |                                                | 99.9                             | 0.82            | 1000 / 1000          |
| APGD <sup>T</sup> <sub>DLR</sub> $\ell_2$ [13] |                                                | 100                              | 0.80            | 7005 / 6977          |
| ALMA $\ell_2$ 100                              |                                                | 100                              | 0.85            | 100 / 100            |
| ALMA $\ell_2$ 1000                             |                                                | 100                              | 0.84            | 1000 / 1000          |
| RN-50<br>$\ell_\infty$ -AT                     |                                                | C&W $\ell_2$ $9 \times 1000$ [7] | 99.6            | 0.76                 |
|                                                | C&W $\ell_2$ $9 \times 10000$ [7]              | 99.6                             | 0.76            | 65203 / 65200        |
|                                                | DDN 100 [26]                                   | 99.8                             | 0.67            | 100 / 100            |
|                                                | DDN 1000 [26]                                  | 100                              | 0.66            | 1000 / 1000          |
|                                                | FAB <sup>T</sup> $\ell_2$ 100 [12]             | 99.8                             | 0.55            | 1810 / 900           |
|                                                | FAB <sup>T</sup> $\ell_2$ 1000 [12]            | 99.4                             | 0.55            | 18010 / 9000         |
|                                                | FMN $\ell_2$ 100 [25]                          | 99.8                             | 0.57            | 100 / 100            |
|                                                | FMN $\ell_2$ 1000 [25]                         | 99.7                             | 0.57            | 1000 / 1000          |
|                                                | APGD <sup>T</sup> <sub>DLR</sub> $\ell_2$ [13] | 100                              | 0.54            | 6647 / 6619          |
|                                                | ALMA $\ell_2$ 100                              | 100                              | 0.62            | 100 / 100            |
|                                                | ALMA $\ell_2$ 1000                             | 100                              | 0.54            | 1000 / 1000          |

Table 12: Performance of the  $\ell_2$  attacks on the ImageNet dataset for each model.

| Model                      | Attack                        | ASR (%) | Median CIEDE2000 | forwards / backwards |
|----------------------------|-------------------------------|---------|------------------|----------------------|
| RN-50                      | C&W CIEDE2000 $9 \times 1000$ | 100     | 0.80             | 4505 / 4500          |
|                            | Perc-AL 100 [37]              | 100     | 1.31             | 201 / 100            |
|                            | Perc-AL 1000 [37]             | 100     | 1.07             | 2001 / 1000          |
|                            | ALMA CIEDE2000 100            | 100     | 0.17             | 100 / 100            |
|                            | ALMA CIEDE2000 1000           | 100     | 0.13             | 1000 / 1000          |
| RN-50<br>$\ell_2$ -AT      | C&W CIEDE2000 $9 \times 1000$ | 100     | 1.64             | 6303 / 6300          |
|                            | Perc-AL 100 [37]              | 99.9    | 5.87             | 201 / 100            |
|                            | Perc-AL 1000 [37]             | 99.9    | 6.07             | 2001 / 1000          |
|                            | ALMA CIEDE2000 100            | 100     | 1.51             | 100 / 100            |
|                            | ALMA CIEDE2000 1000           | 100     | 1.34             | 1000 / 1000          |
| RN-50<br>$\ell_\infty$ -AT | C&W CIEDE2000 $9 \times 1000$ | 100     | 2.05             | 6303 / 6300          |
|                            | Perc-AL 100 [37]              | 99.8    | 5.82             | 201 / 100            |
|                            | Perc-AL 1000 [37]             | 99.9    | 6.12             | 2001 / 1000          |
|                            | ALMA CIEDE2000 100            | 100     | 1.61             | 100 / 100            |
|                            | ALMA CIEDE2000 1000           | 100     | 1.46             | 1000 / 1000          |

Table 13: Performance of the CIEDE2000 attacks on the CIFAR10 dataset for each model.

| Model | Attack                    | ASR (%) | Median LPIPS $\times 10^{-2}$ | forwards / backwards |
|-------|---------------------------|---------|-------------------------------|----------------------|
| RN-50 | C&W LPIPS $9 \times 1000$ | 100     | 2.39                          | 2332 / 2325          |
|       | LPA <sup>‡</sup> [21]     | 100     | 5.02                          | 1159 / 1149          |
|       | ALMA LPIPS 100            | 100     | 0.34                          | 100 / 100            |
|       | ALMA LPIPS 1000           | 100     | 0.24                          | 1000 / 1000          |
| RN-50 | C&W LPIPS $9 \times 1000$ | 100     | 2.22                          | 7701 / 7700          |
|       | LPA <sup>‡</sup> [21]     | 100     | 6.83                          | 1257 / 1247          |
|       | $\ell_2$ -AT              | 100     | 3.96                          | 100 / 100            |
|       | ALMA LPIPS 1000           | 100     | 2.90                          | 1000 / 1000          |
| RN-50 | C&W LPIPS $9 \times 1000$ | 100     | 1.68                          | 6753 / 6750          |
|       | LPA <sup>‡</sup> [21]     | 100     | 5.66                          | 1218 / 1208          |
|       | $\ell_\infty$ -AT         | 100     | 2.99                          | 100 / 100            |
|       | ALMA LPIPS 1000           | 100     | 2.11                          | 1000 / 1000          |

Table 14: Performance of the LPIPS variant of ALMA on the ImageNet dataset for each model. <sup>‡</sup>A binary search is performed on each sample to get a minimal perturbation attack (Equation 2).

| Model             | Attack         | ASR (%) | Median 1-SSIM $\times 10^{-5}$ | forwards / backwards |
|-------------------|----------------|---------|--------------------------------|----------------------|
| RN-50             | ALMA SSIM 100  | 100     | 0.44                           | 100 / 100            |
|                   | ALMA SSIM 1000 | 100     | 0.05                           | 1000 / 1000          |
| RN-50             | ALMA SSIM 100  | 100     | 16.13                          | 100 / 100            |
| $\ell_2$ -AT      | ALMA SSIM 1000 | 100     | 5.58                           | 1000 / 1000          |
| RN-50             | ALMA SSIM 100  | 100     | 8.69                           | 100 / 100            |
| $\ell_\infty$ -AT | ALMA SSIM 1000 | 100     | 2.77                           | 1000 / 1000          |

Table 15: Performance of the SSIM variant of ALMA on the ImageNet dataset for each model.

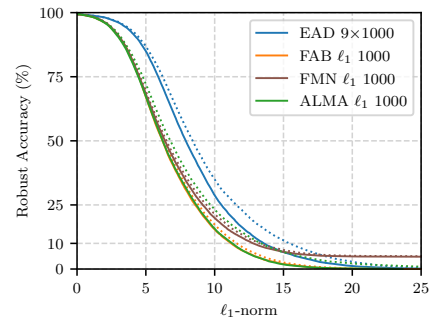

(a) SmallCNN

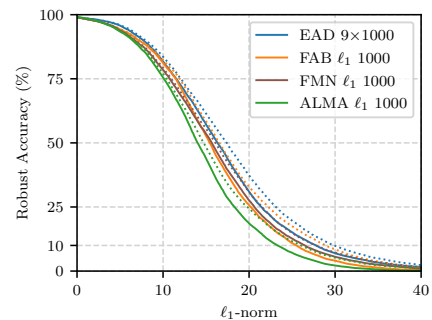

(b) SmallCNN-DDN

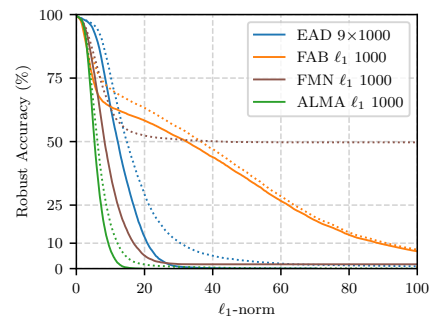

(c) SmallCNN-TRADES

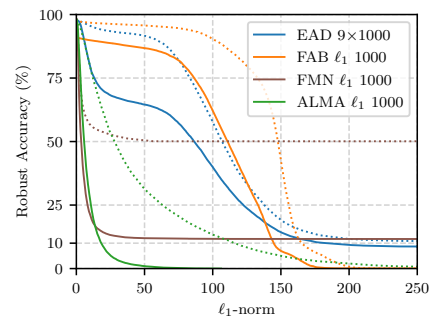

(d) CROWN-IBP

Figure 6: Robust accuracy curves for MNIST models against  $\ell_1$  attacks.

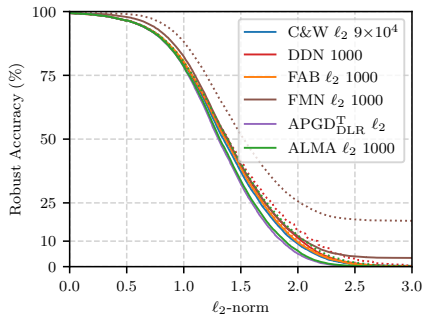

(a) SmallCNN

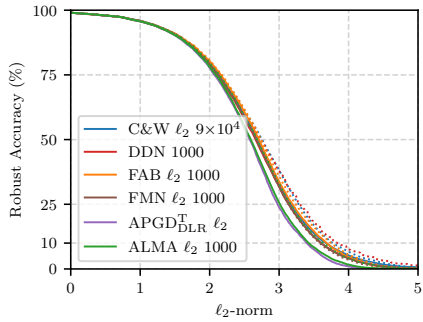

(b) SmallCNN-DDN

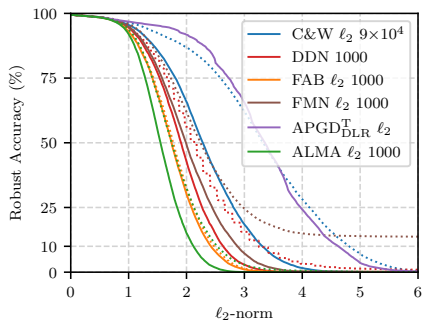

(c) SmallCNN-TRADES

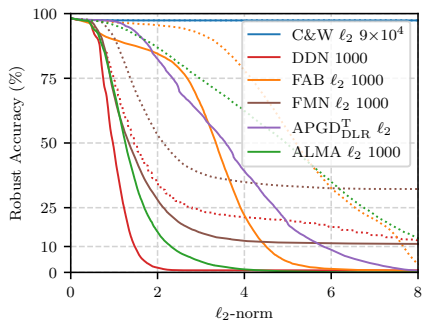

(d) CROWN-IBP

Figure 7: Robust accuracy curves for MNIST models against  $\ell_2$  attacks.

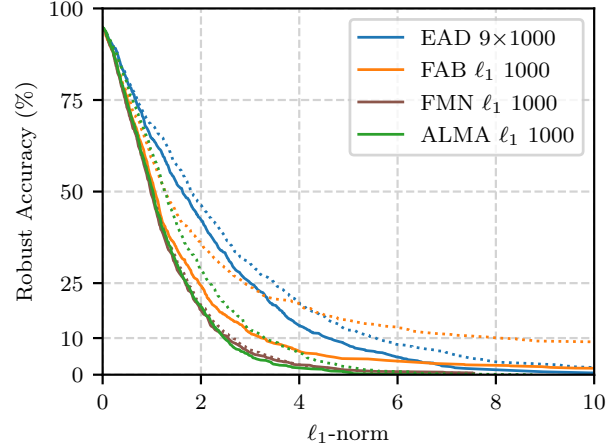

(a) Wide ResNet 28-10

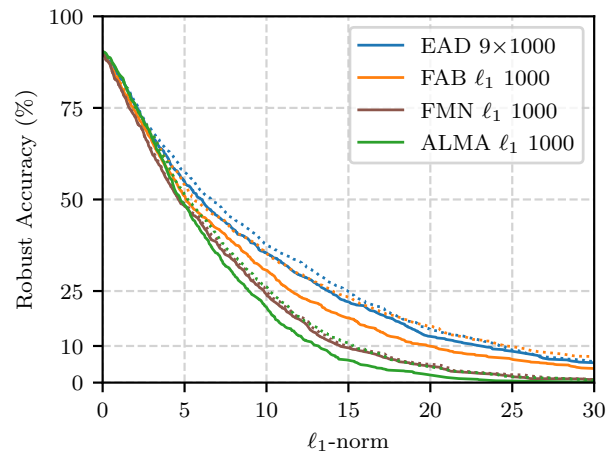

(b) Wide ResNet 28-10 Carmon *et al.* [8]

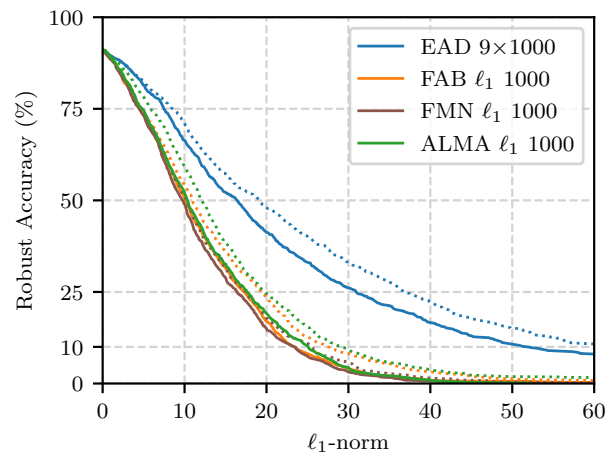

(c) ResNet-50 Augustin *et al.* [1]

Figure 8: Robust accuracy curves for CIFAR10 models against  $\ell_1$  attacks.

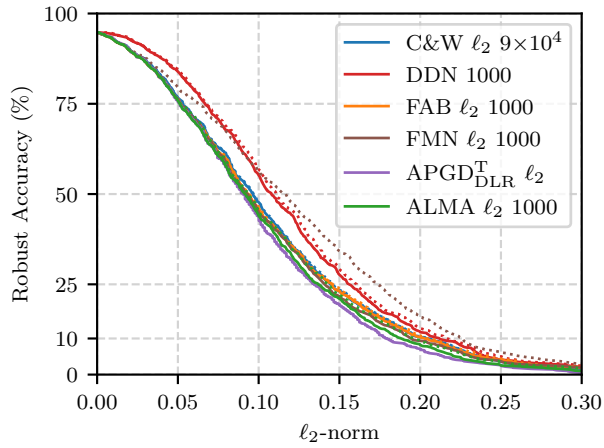

(a) Wide ResNet 28-10

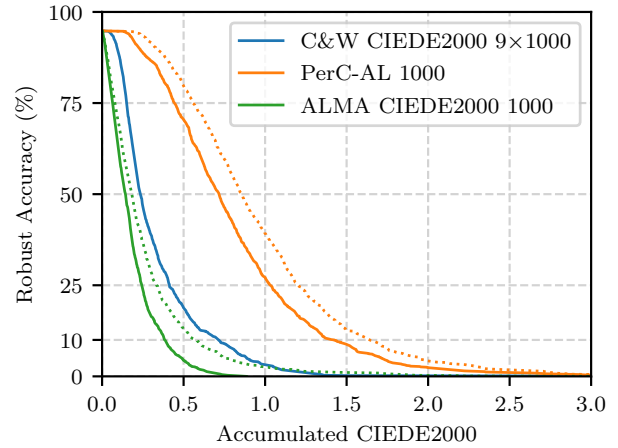

(a) Wide ResNet 28-10

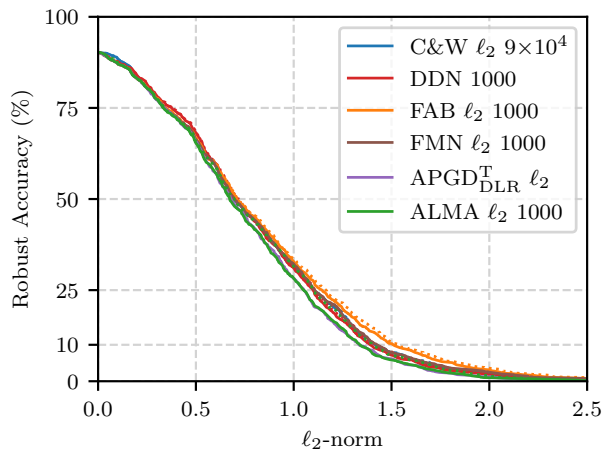

(b) Wide ResNet 28-10 Carmon *et al.* [8]

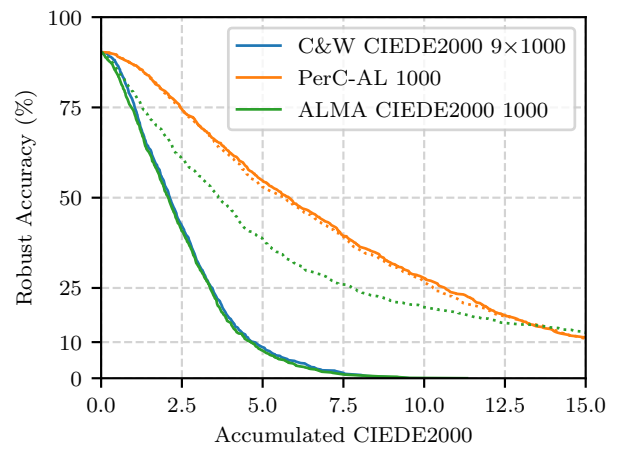

(b) Wide ResNet 28-10 Carmon *et al.* [8]

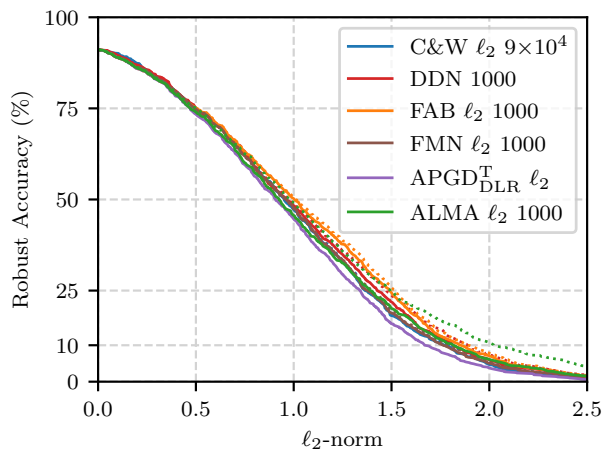

(c) ResNet-50 Augustin *et al.* [1]

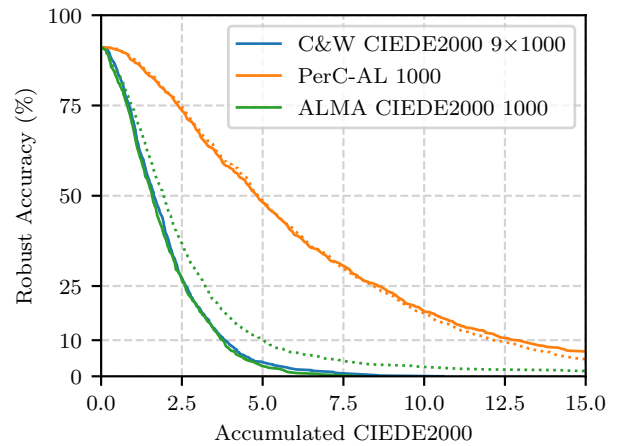

(c) ResNet-50 Augustin *et al.* [1]

Figure 9: Robust accuracy curves for CIFAR10 models against  $\ell_2$  attacks.

Figure 10: Robust accuracy curves for CIFAR10 models against CIEDE2000 attacks.



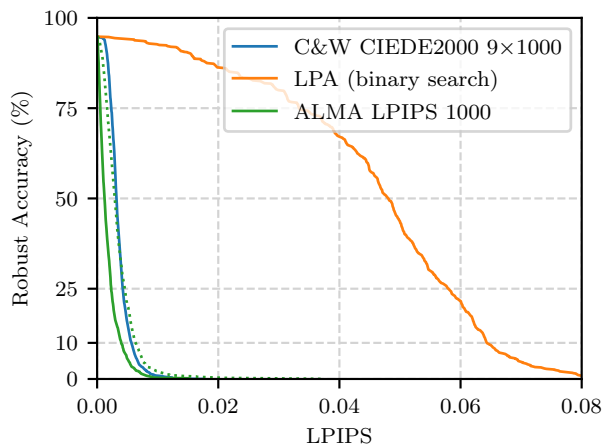

(a) Wide ResNet 28-10

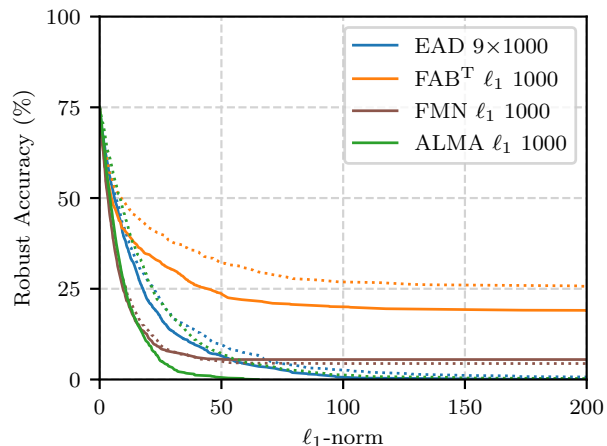

(a) ResNet-50

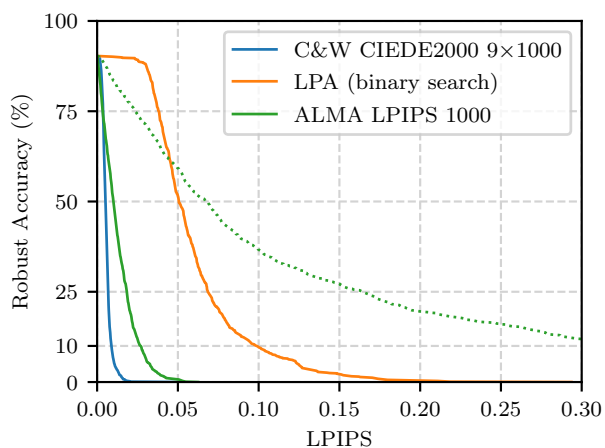

(b) Wide ResNet 28-10 Carmon *et al.* [8]

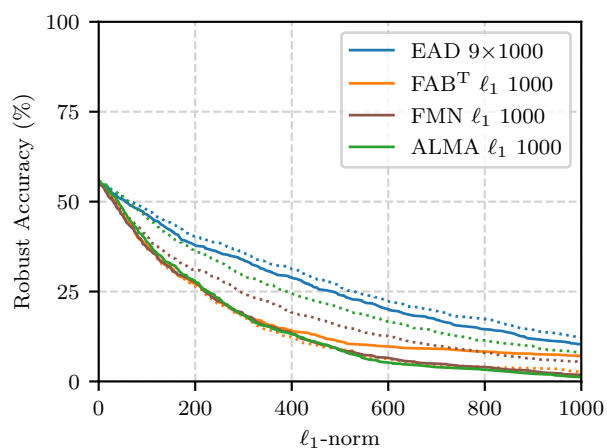

(b) ResNet-50  $\ell_2$  adv. trained

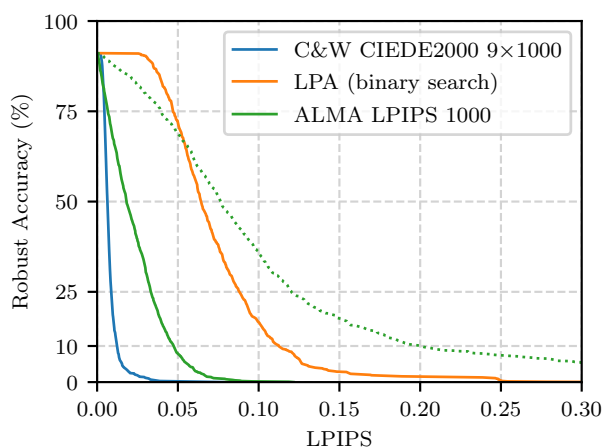

(c) ResNet-50 Augustin *et al.* [1]

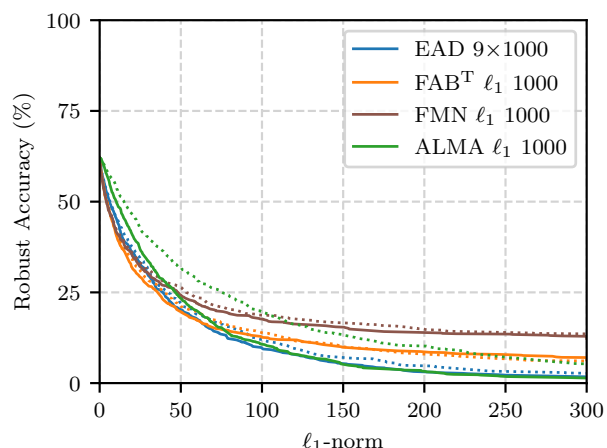

(c) ResNet-50  $\ell_\infty$  adv. trained

Figure 11: Robust accuracy curves for CIFAR10 models against LPIPS attacks.

Figure 12: Robust accuracy curves for ImageNet models against  $\ell_1$  attacks.

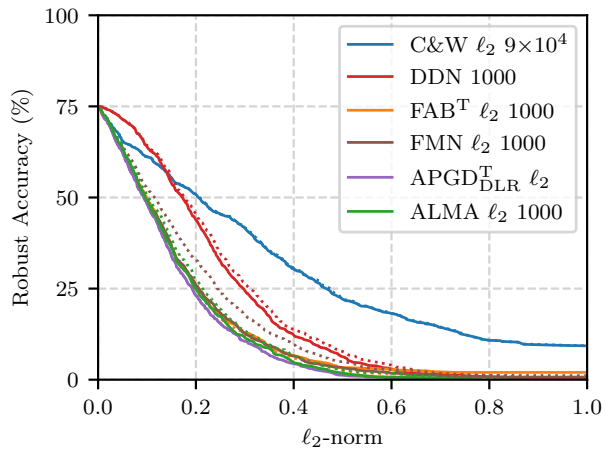

(a) ResNet-50

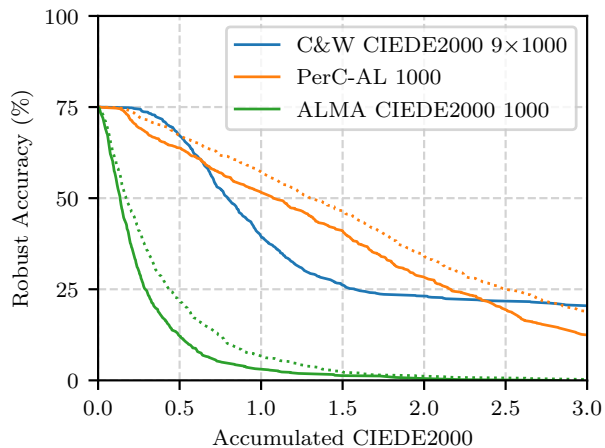

(a) ResNet-50

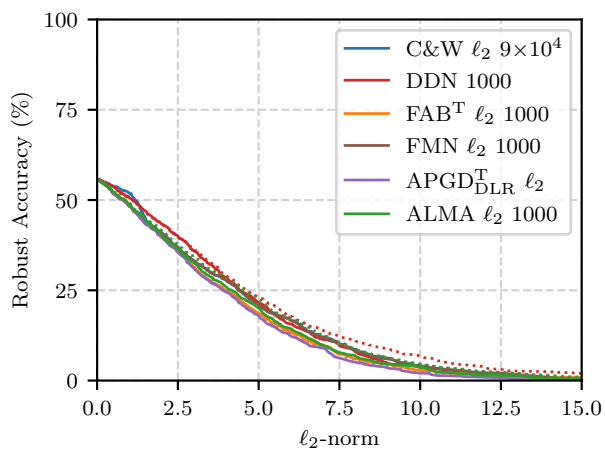

(b) ResNet-50  $\ell_2$  adv. trained

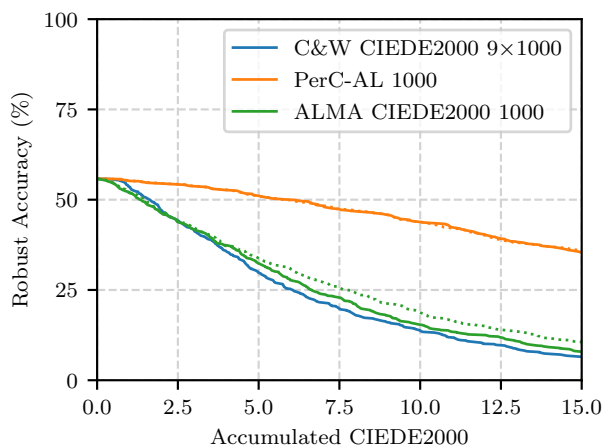

(b) ResNet-50  $\ell_2$  adv. trained

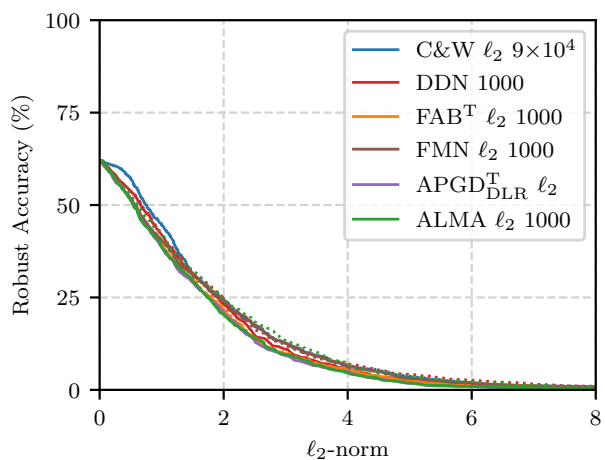

(c) ResNet-50  $\ell_\infty$  adv. trained

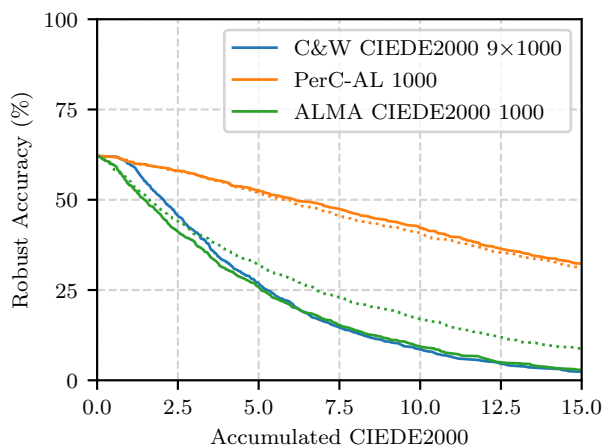

(c) ResNet-50  $\ell_\infty$  adv. trained

Figure 13: Robust accuracy curves for ImageNet models against  $\ell_2$  attacks.

Figure 14: Robust accuracy curves for ImageNet models against CIEDE2000 attacks.

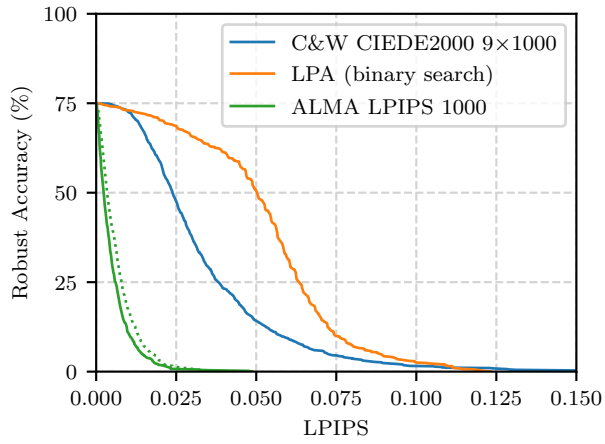

(a) ResNet-50

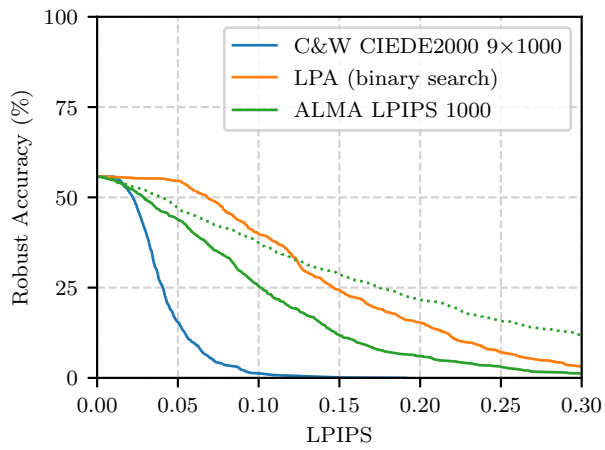

(b) ResNet-50  $\ell_2$  adv. trained

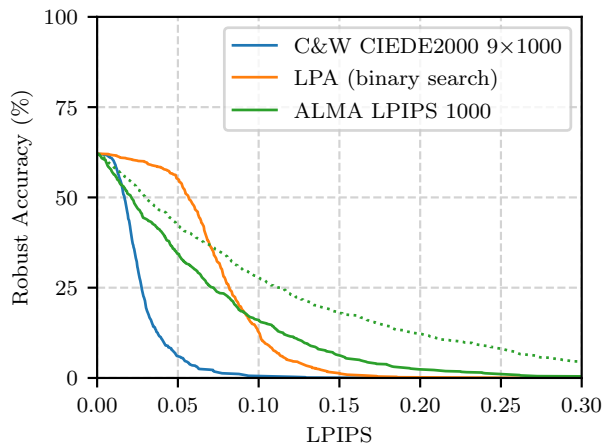

(c) ResNet-50  $\ell_\infty$  adv. trained

Figure 15: Robust accuracy curves for ImageNet models against LPIPS attacks.
